# Supplementary material for: Analysis of Dieback in a Coastal Pinewood in Campania, Southern Italy, through High-Resolution Remote Sensing
Source: MDPI journal article supplement (doi:10.3390/plants13020182), 2024-01-09

SAMPLE PLOT 5

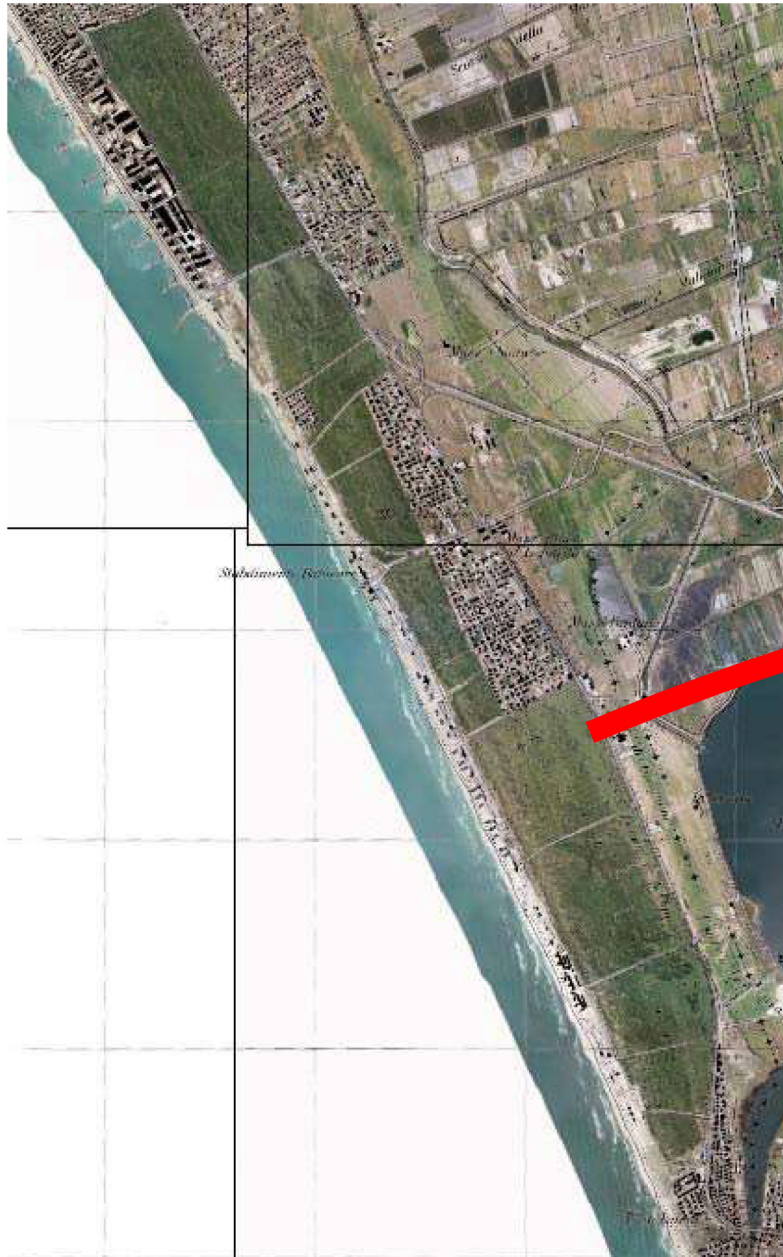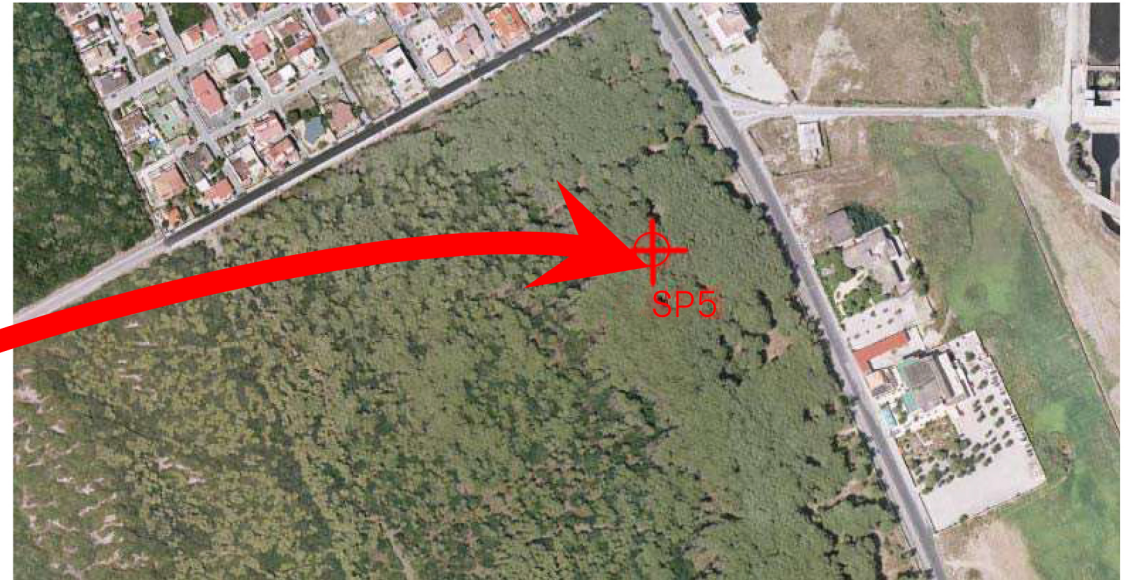



## TOPSOIL ANALYSIS

### TOPSOIL DESCRIPTION

Even-aged forest *Pinus pinea* L. dominated. In the part of the thinned high forest and adequate distances between the plants, the largest diameters are found ( $> 40\text{cm}$ ), while in the non-thinned area the diameters are on average 24 cm. Green foliage present in the upper 1/4 of the stem, semi-transparent, many stems are inclined, especially in the area not thinned towards the Domitiana state road. Polycormic stone pine plants present. Structure conditioned by excessive density caused by the lack of silvicultural interventions (thinning and spreading) as well as by the action of sea winds. Dense layer of undecomposed litter on which a sparse herbaceous layer develops consisting mostly of *Smilax aspera*, holm oak seedlings, *Rubia peregrina*, *Asparagus acutifolius*. Renewal of *Pinus pinea* absent.

### TOPSOIL TRANSECT REPRESENTATION

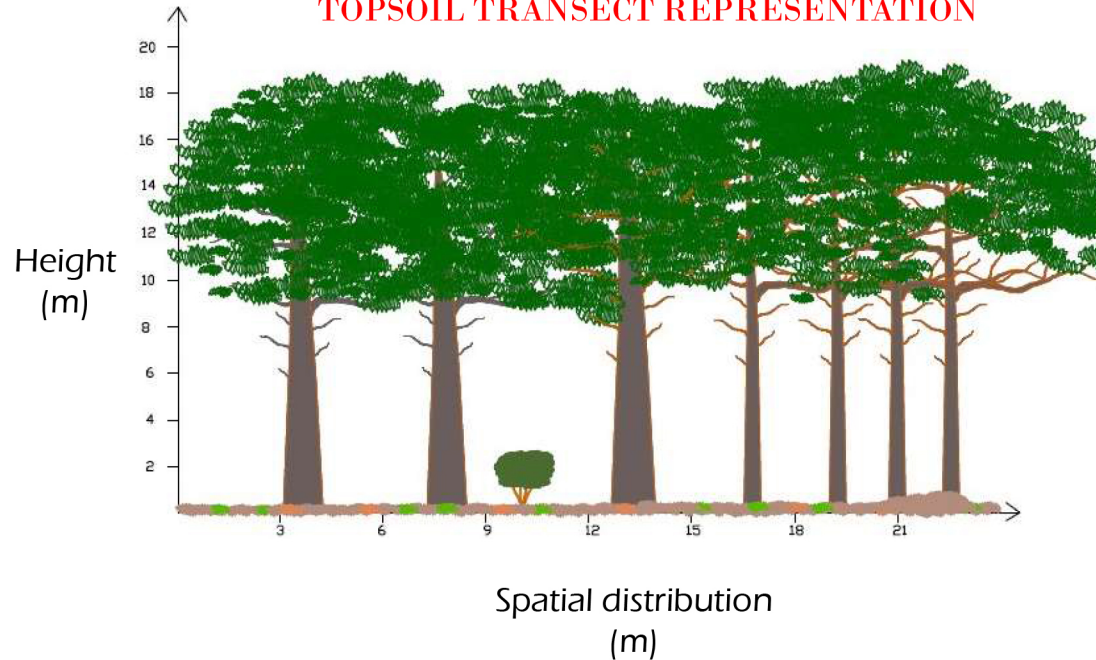

### TOPSOIL PHOTOGRAPHIC REPRESENTATION

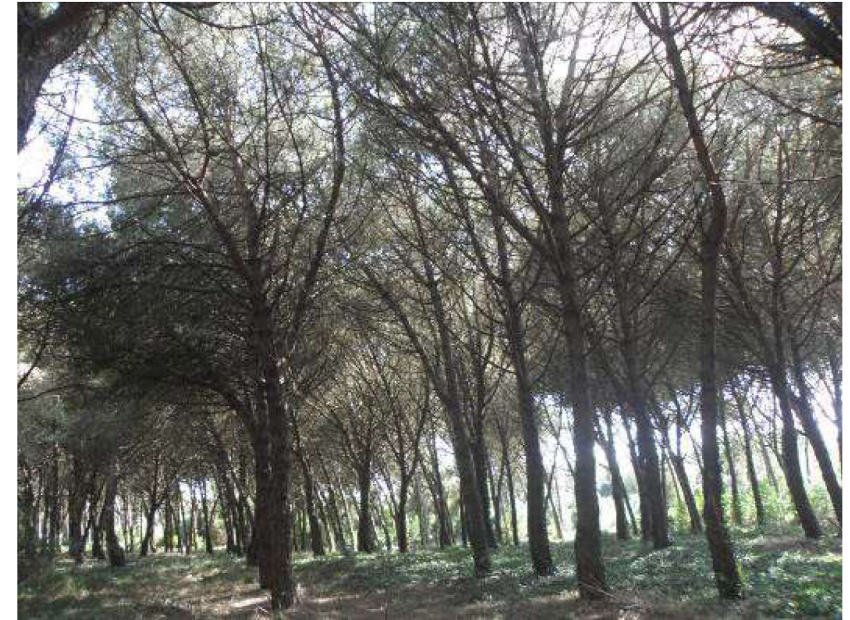

DENDROMETRICS PROCESSING

| SP5                     |                        |          |        |          |           |       |            |
|-------------------------|------------------------|----------|--------|----------|-----------|-------|------------|
| Pine forest Sector 5    | Location               | Sup.(ha) | Aspect | Alt. (m) | Slope Avg | Max   | Age        |
| Diameter at 1,30 m (cm) | Species, Plants number |          |        |          |           |       |            |
|                         | Pinus pinea            |          |        |          |           |       |            |
|                         |                        |          |        |          |           |       | tot tot/ha |
| 5                       |                        |          |        |          |           |       | 0 0        |
| 10                      |                        |          |        |          |           |       | 0 0        |
| 15                      | 3                      |          |        |          |           |       | 3 24       |
| 20                      | 24                     |          |        |          |           |       | 24 191     |
| 25                      | 25                     |          |        |          |           |       | 25 199     |
| 30                      | 13                     |          |        |          |           |       | 13 103     |
| 35                      | 4                      |          |        |          |           |       | 4 32       |
| 40                      | 4                      |          |        |          |           |       | 4 32       |
| 45                      | 3                      |          |        |          |           |       | 3 24       |
| 50                      | 4                      |          |        |          |           |       | 4 32       |
| 55                      | 3                      |          |        |          |           |       | 3 24       |
| 60                      |                        |          |        |          |           |       | 0 0        |
| 65                      |                        |          |        |          |           |       |            |
| 70                      |                        |          |        |          |           |       |            |
| 75                      |                        |          |        |          |           |       |            |
| 80                      |                        |          |        |          |           |       |            |
| 85                      |                        |          |        |          |           |       |            |
| 90                      |                        |          |        |          |           |       |            |
| 95                      |                        |          |        |          |           |       |            |
| 100                     |                        |          |        |          |           |       |            |
| Plants                  | 83                     | 0        | 0      | 0        | 0         | 0     | 83         |
| tot/ha                  | 660                    | 0        | 0      | 0        | 0         | 0     | 660        |
| Dead Plants             | 11                     | 0        | 0      | 0        | 0         | 0     | 11         |
| Dead p./ha              | 88                     | 0        | 0      | 0        | 0         | 0     | 88         |
| Stumps                  | 0                      | 0        | 0      | 0        | 0         | 0     | 0          |
| stumps/ha               | 0                      | 0        | 0      | 0        | 0         | 0     | 0          |
| Dead stumps             | 0                      | 0        | 0      | 0        | 0         | 0     | 0          |
| Dead st./ha             | 0                      | 0        | 0      | 0        | 0         | 0     | 0          |
| Basal Area              | 5,82                   | 0,00     | 0,00   | 0,00     | 0,00      | 0,00  | 5,82       |
| Basal Area/ha           | 46,3                   | 0,0      | 0,0    | 0,0      | 0,0       | 0,000 | 46,28      |

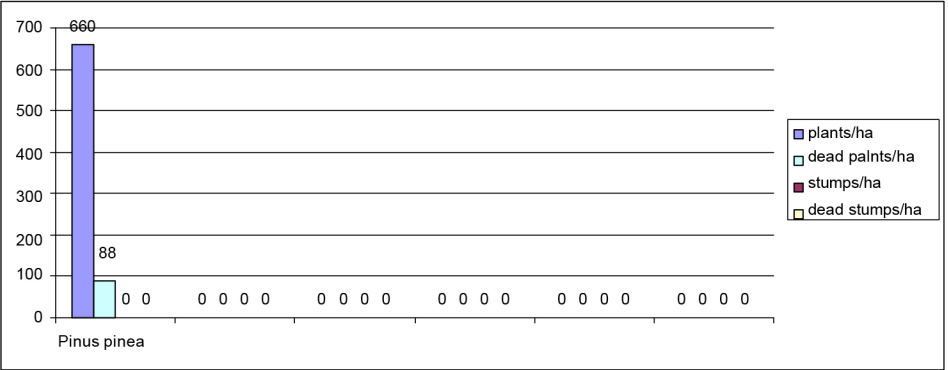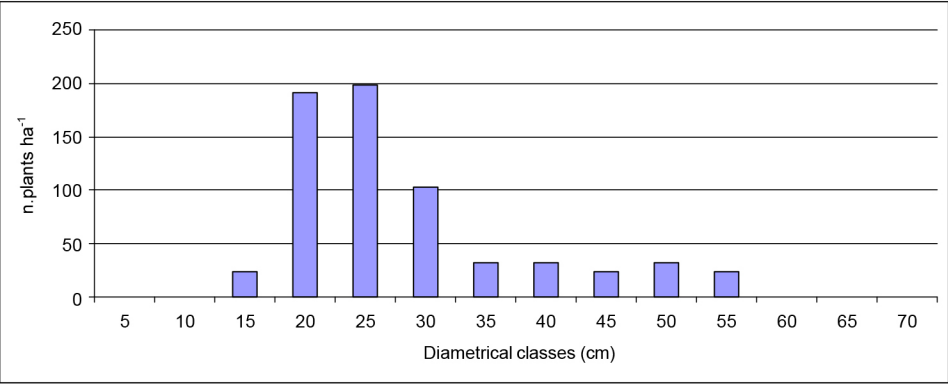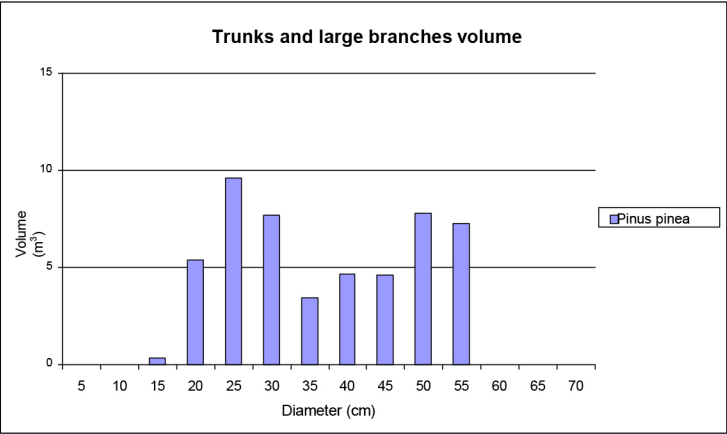

Supplement: s1 [file s1]
